# Supplementary material for: Transcriptome analysis of novel B16 melanoma metastatic variants generated by serial intracarotid artery injection
Source: PubMed Central journal article supplement (PMC11737150; doi:10.1186/s40478-025-01924-1), 2025-01-16
Supplement: 40478_2025_1924_MOESM3_ESM.pdf [file 40478_2025_1924_MOESM3_ESM.pdf]

### Additional file 3: Heat maps

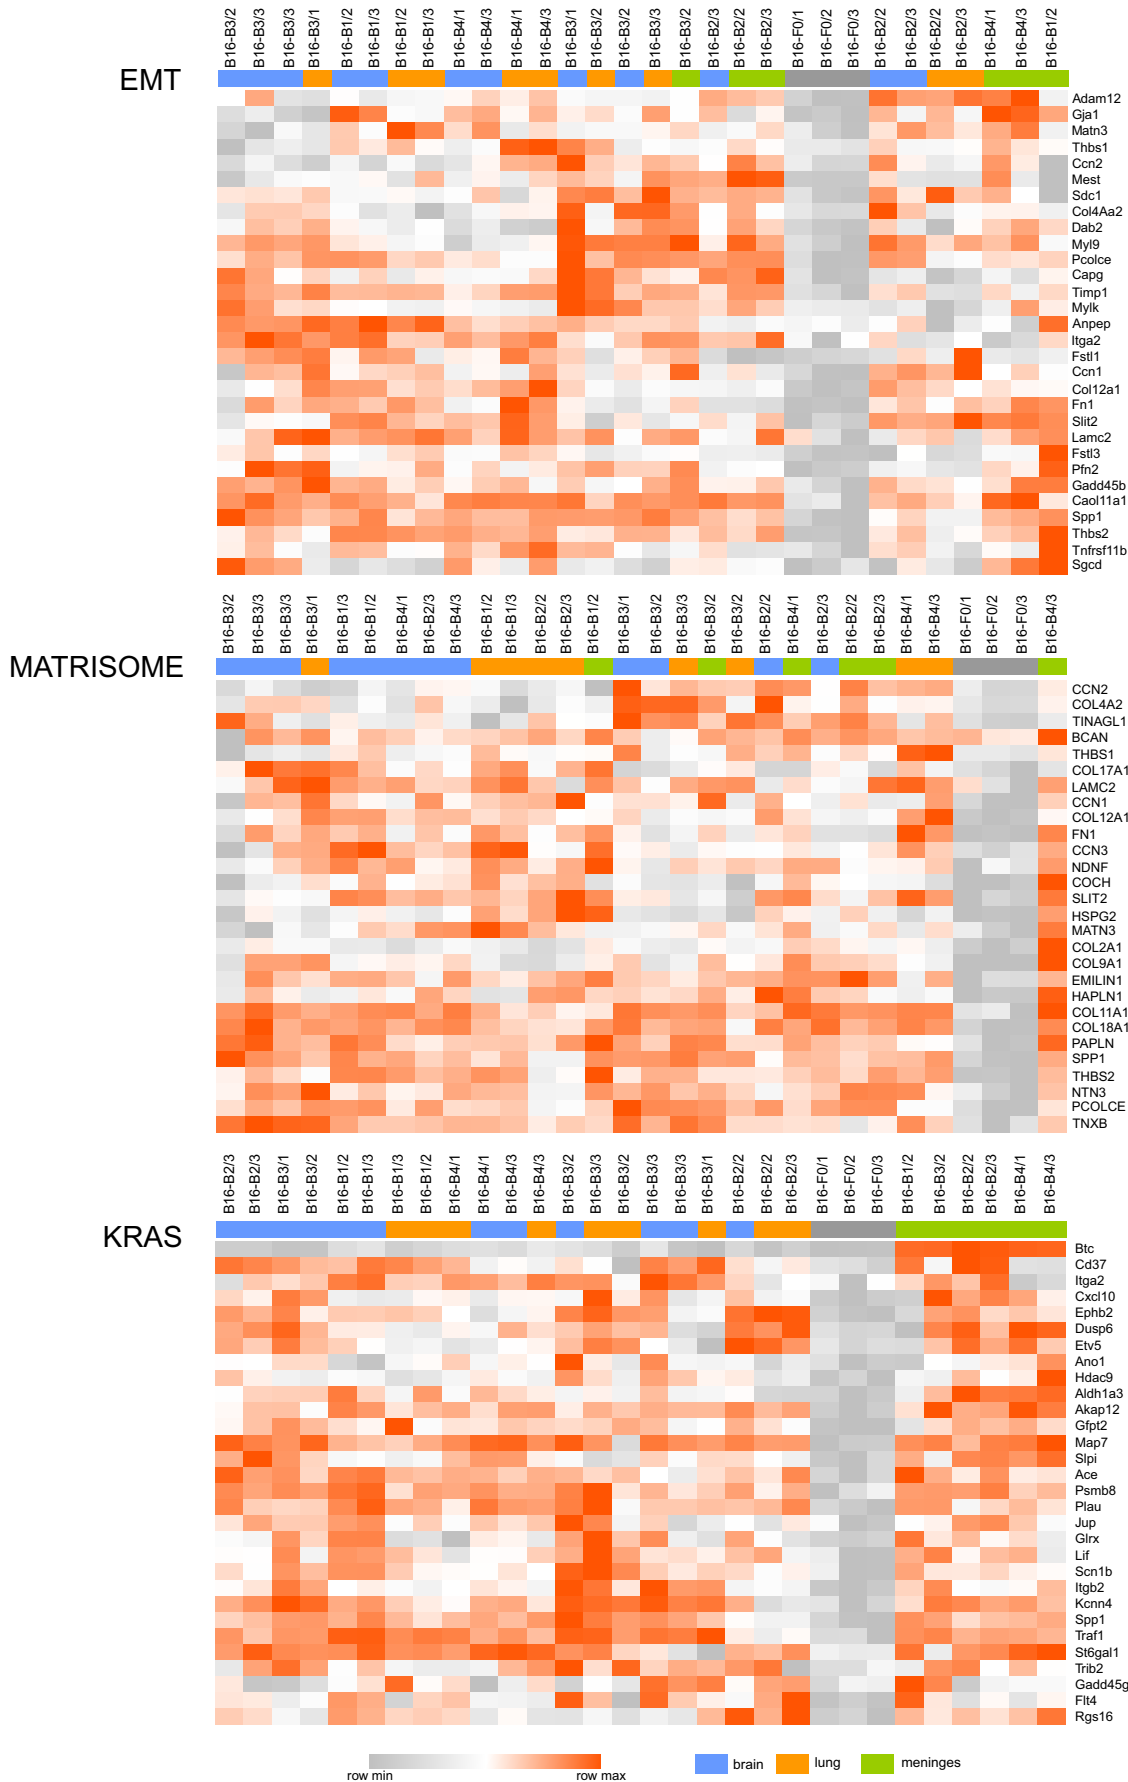

Heat maps of log<sub>2</sub> normalized counts of top core genes with a rank metric score >1 from the GSEA. Hierarchical clustering of columns and rows using a 1- Pearson correlation coefficients as the distance metric and clustering using the average linkage method.
