# Supplementary material for: Transcriptome analysis of novel B16 melanoma metastatic variants generated by serial intracarotid artery injection
Source: PubMed Central journal article supplement (PMC11737150; doi:10.1186/s40478-025-01924-1), 2025-01-16

## Additional file 4: Box plots of TCGA data

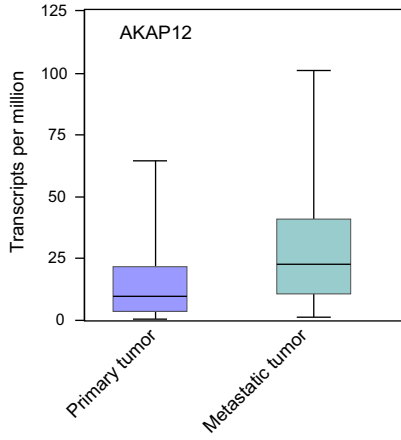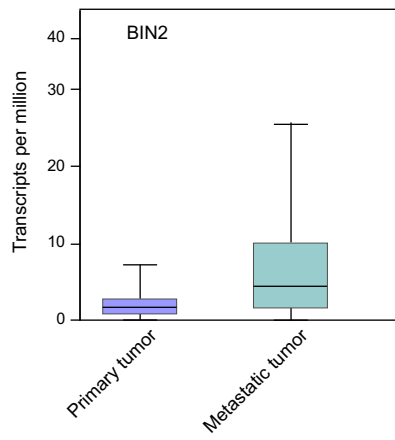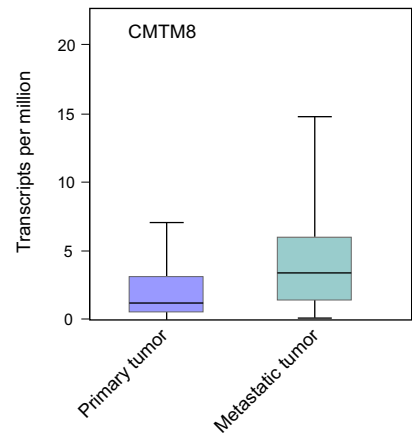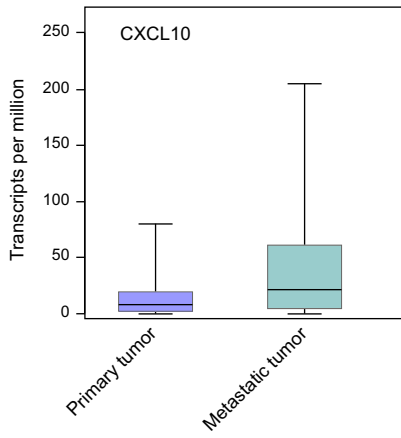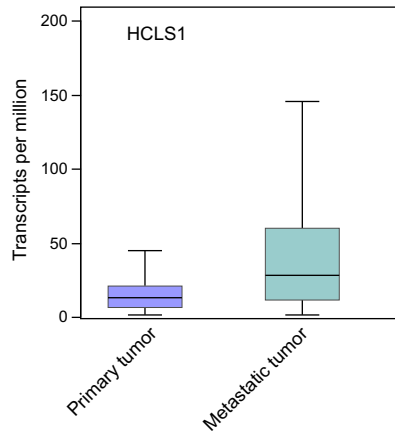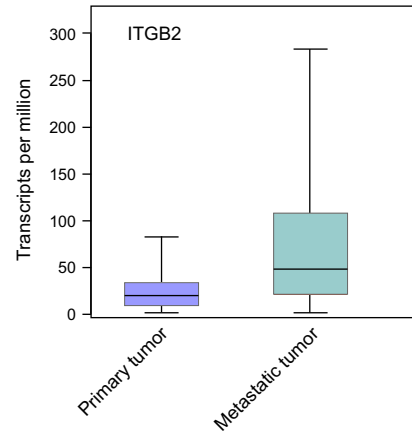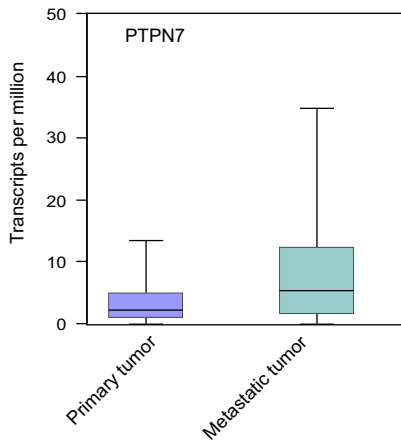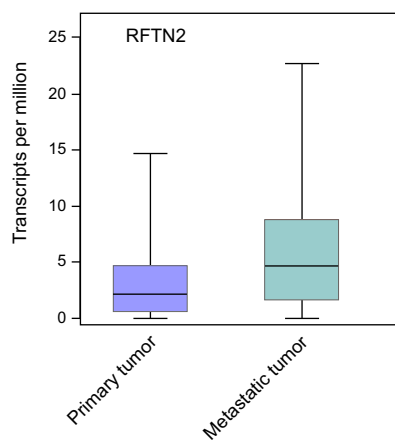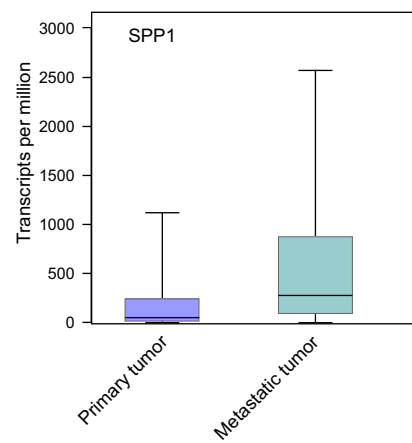

Supplement: 40478_2025_1924_MOESM4_ESM.pdf [file 40478_2025_1924_MOESM4_ESM.pdf]
