# Supplementary material for: Transcriptome analysis of novel B16 melanoma metastatic variants generated by serial intracarotid artery injection
Source: PubMed Central journal article supplement (PMC11737150; doi:10.1186/s40478-025-01924-1), 2025-01-16
Supplement: 40478_2025_1924_MOESM5_ESM.pdf [file 40478_2025_1924_MOESM5_ESM.pdf]

## Additional file 5: PPI network

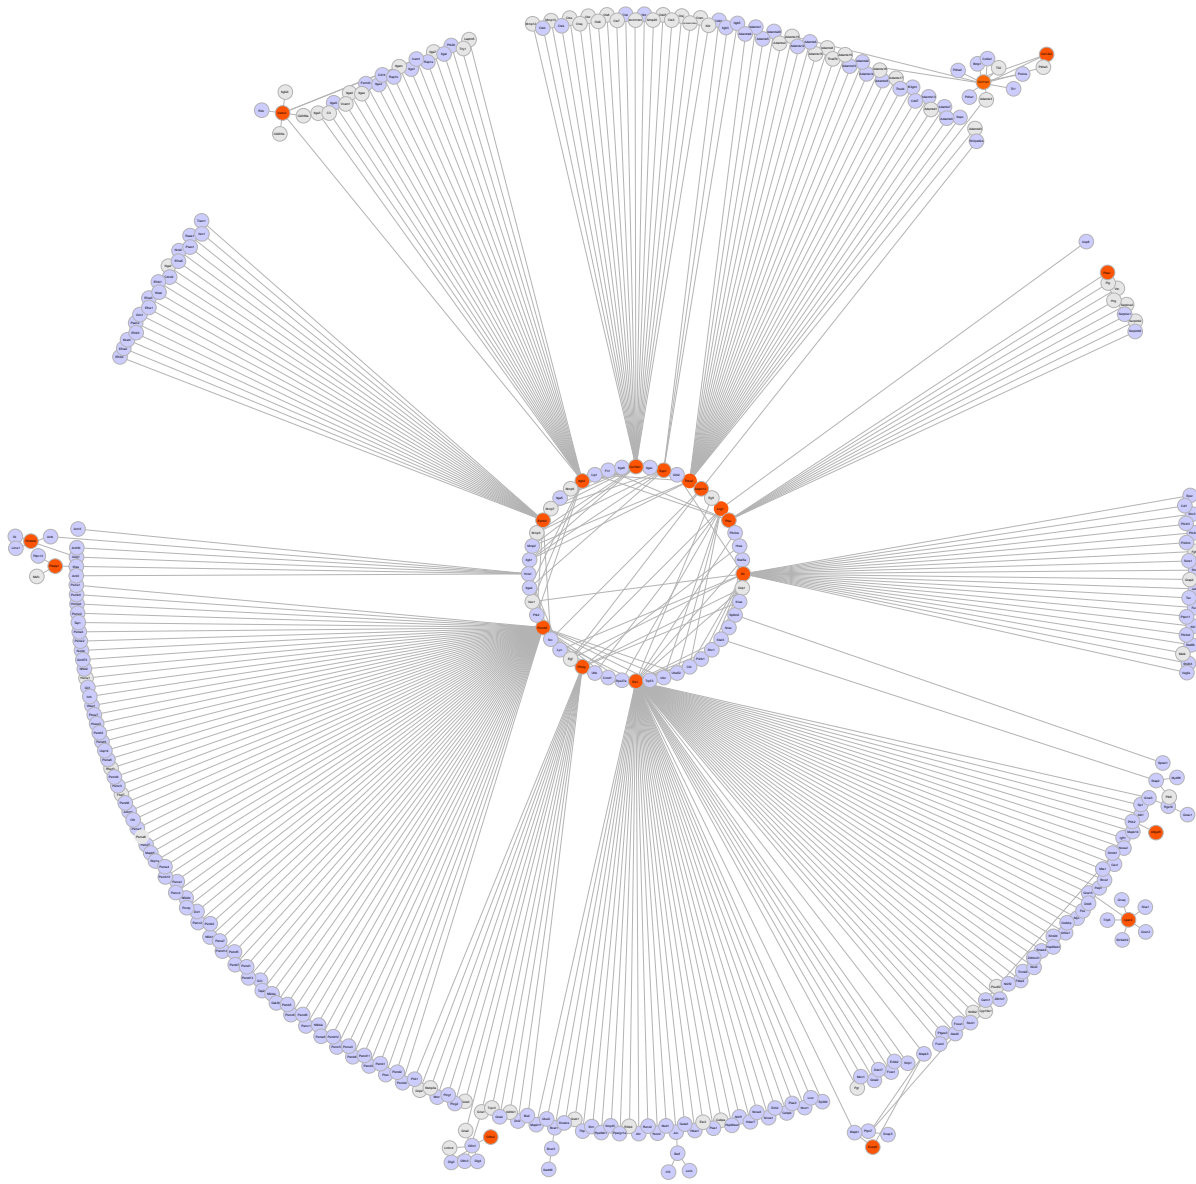

The human orthologs of the 104 differentially expressed genes were input into NetworkAnalyst to generate a network of protein: protein interactions (PPI) based on the STRING database. Each spoke in the network represents a high confidence functional association.

- Gene from list of 104 differentially expressed genes (Figure 3)
- Gene from list of genes expressed in B16 cells (Additional File 1)
- Gene not found in the list of expressed genes (Additional File 1)
